# Supplementary material for: Online Product Opinions: Incidence, Evaluation, and Evolution
Source: Atypon-hosted journal article supplement (doi:10.1287/mksc.1110.0662), 2011-08-26
Supplement: mksc.1110.0662-sm-ec.pdf [file mksc.1110.0662-sm-ec.pdf]

## Online Technical Appendix: Estimation Details

Following Netzer, Lattin and Srinivasan (2005), the model parameters to be estimated can be divided into three parts: (1) the fixed effects governing the evaluation, incidence, and latent experience components of the model which do not vary across individuals or products, (2) individual-specific deviations from the fixed effects governing evaluation and incidence behavior, and (3) product-specific deviations from the fixed effects in the evaluation model and latent experience component.

We denote by  $\psi$  the set of fixed effects from the evaluation model ( $\bar{\gamma}$  and  $\eta$ ), the incidence model ( $\bar{\beta}$ ,  $\delta_1$  and  $\delta_2$ ), and latent experience model ( $\theta$ ). We let  $\zeta_i$  be a vector of the individual-specific deviations from the fixed effects  $\bar{\gamma}$  and  $\bar{\beta}$ . As noted in equation (11),  $\zeta_i \sim \text{MVN}(0, \Sigma)$ . We let  $\xi_i$  denote the individual-specific deviations from  $\eta$ , where  $\xi_i \sim \text{MVN}(0, T)$ .

The MCMC procedure draws parameters from the conditional distribution of the model parameters:

$$\begin{aligned}
 & \zeta_i | \mathbf{Y}_i, \mathbf{X}_i, \xi_i, \psi, \{\kappa\}, \{\tau\}, \Sigma \\
 & \xi_i | \mathbf{Y}_i, \mathbf{X}_i, \zeta_i, \psi, \{\kappa\}, \{\tau\}, T \\
 & \{\kappa\} | \mathbf{Y}, \mathbf{X}, \{\zeta_i\}, \{\xi_i\}, \psi, \{\tau\}, \sigma_\kappa \\
 & \{\tau\} | \mathbf{Y}, \mathbf{X}, \{\zeta_i\}, \{\xi_i\}, \psi, \{\kappa\}, \sigma_\tau \\
 & \Sigma | \{\zeta_i\} \\
 & T | \{\xi_i\} \\
 & \sigma_\kappa^2 | \{\kappa\} \\
 & \sigma_\tau^2 | \{\tau\} \\
 & \psi | \mathbf{Y}, \mathbf{X}, \{\zeta_i\}, \{\xi_i\}, \{\kappa\}, \{\tau\}
 \end{aligned}$$

where  $\mathbf{Y}_i$  the set of observations from  $i$  (incidence decisions  $\mathbf{z}_i$  and evaluation decisions  $\mathbf{y}_i$ ) and  $\mathbf{X}_i$  denotes the state of the ratings environment at the time of the observations.

We next describe how we sample the individual-specific random effects ( $\zeta_i$  and  $\xi_i$ ), product-specific random effects ( $\{\kappa\}$  and  $\{\tau\}$ ), covariance matrices governing the random effects ( $\Sigma$ ,  $T$ ,  $\sigma_\kappa$ , and  $\sigma_\tau$ ), and fixed effects ( $\psi$ ).

**(1) Generating individual-specific random effects for individual  $i$**

$$\begin{aligned}
& f(\zeta_i | \mathbf{Y}_i, \mathbf{X}_i, \xi_i, \psi, \{\kappa\}, \{\tau\}, \Sigma) \\
& \propto \pi(\zeta_i | \Sigma) L(\mathbf{Y}_i | \zeta_i) \\
& \propto |\Sigma|^{-.5} \exp[.5 \zeta_i' \Sigma^{-1} \zeta_i] L(\mathbf{Y}_i | \zeta_i)
\end{aligned} \tag{A1}$$

where  $\pi(\zeta_i | \Sigma)$  is the prior distribution of  $\zeta_i$  and  $L(\mathbf{Y}_i | \zeta_i)$  is the individual-specific likelihood given by equation (10). Since (A1) does not have a closed form, we use a random walk Metropolis-Hastings algorithm with a Gaussian jumping distribution to draw from the conditional distribution of  $\zeta_i$ . Letting  $\zeta_i^{(t)}$  denote the value of the vector on draw  $t$ , the probability that of accepting draw  $t+1$  is given by:

$$\Pr(\text{accept}) = \min \left( \frac{\exp[-.5(\zeta_i^{(t+1)})' \Sigma^{-1} \zeta_i^{(t+1)}] L(\mathbf{Y}_i | \zeta_i^{(t+1)})}{\exp[-.5(\zeta_i^{(t)})' \Sigma^{-1} \zeta_i^{(t)}] L(\mathbf{Y}_i | \zeta_i^{(t)})}, 1 \right) \tag{A2}$$

The procedure to draw  $\xi_i$  is similar:

$$\begin{aligned}
& f(\xi_i | \mathbf{Y}_i, \mathbf{X}_i, \zeta_i, \psi, \{\kappa\}, \{\tau\}, T) \\
& \propto \pi(\xi_i | T) L(\mathbf{Y}_i | \xi_i) \\
& \propto |T|^{-.5} \exp[.5 \xi_i' T^{-1} \xi_i] L(\mathbf{Y}_i | \xi_i)
\end{aligned} \tag{A3}$$

A random walk Metropolis-Hastings algorithm is used to draw from the conditional distribution of  $\xi_i$ , where the probability of accepting a new draw is:

$$\Pr(\text{accept}) = \min\left(\frac{\exp[-.5(\xi_i^{(t+1)})^T \Gamma^{-1} \xi_i^{(t+1)}] L(\mathbf{Y}_i | \xi_i^{(t+1)})}{\exp[-.5(\xi_i^{(t)})^T \Gamma^{-1} \xi_i^{(t)}] L(\mathbf{Y}_i | \xi_i^{(t)})}, 1\right) \quad (\text{A4})$$

**(2) Generating product-specific random effect for product  $j$**

$$f(\{\kappa\} | \mathbf{Y}, \mathbf{X}, \{\zeta_i\}, \{\xi_i\}, \Psi, \{\tau\}, \sigma_\kappa)$$

$$\propto \pi(\{\kappa\} | \sigma_\kappa) L(\mathbf{Y} | \{\kappa\})$$

$$\propto \Pi(\sigma_\kappa^{-1} \exp[-\kappa_j^2 / 2\sigma_\kappa^2]) L(\mathbf{Y} | \{\kappa\}) \quad (\text{A5})$$

where  $L(\mathbf{Y} | \{\kappa\})$  denotes the likelihood of the data, derived by taking the product of the individual-specific likelihood in equation (10) across individuals. We use a random walk Metropolis-Hastings algorithm to draw from the conditional distribution of  $\{\kappa\}$ . The probability of accepting  $\{\kappa\}^{(t+1)}$  is:

$$\Pr(\text{accept}) = \min\left(\frac{\exp\left(-\frac{1}{2} \sum_j \left(\frac{\kappa_j^{(t+1)}}{\sigma_\kappa}\right)^2\right) L(\mathbf{Y} | \{\kappa\}^{(t+1)})}{\exp\left(-\frac{1}{2} \sum_j \left(\frac{\kappa_j^{(t)}}{\sigma_\kappa}\right)^2\right) L(\mathbf{Y} | \{\kappa\}^{(t)})}, 1\right) \quad (\text{A6})$$

Drawing from the conditional distribution of  $\{\tau\}$  follows a similar procedure:

$$f(\{\tau\} | \mathbf{Y}, \mathbf{X}, \{\zeta_i\}, \{\xi_i\}, \Psi, \{\kappa\}, \sigma_\tau)$$

$$\propto \pi(\{\tau\} | \sigma_\tau) L(\mathbf{Y} | \{\tau\})$$

$$\propto \Pi(\sigma_\tau^{-1} \exp[-\tau_j^2 / 2\sigma_\tau^2]) L(\mathbf{Y} | \{\tau\}) \quad (\text{A7})$$

Using the random walk Metropolis-Hastings algorithm, the probability of accepting draw  $t+1$  is:

$$\text{Pr(accept)} = \min \left( \frac{\exp \left( -\frac{1}{2} \sum_j \left( \frac{\tau_j^{(t+1)}}{\sigma_\tau} \right)^2 \right) L(\mathbf{Y} | \{\tau\}^{(t+1)})}{\exp \left( -\frac{1}{2} \sum_j \left( \frac{\tau_j^{(t)}}{\sigma_\tau} \right)^2 \right) L(\mathbf{Y} | \{\tau\}^{(t)})}, 1 \right) \quad (\text{A8})$$

For efficiency, we update the parameters  $\{\kappa\}$  and  $\{\tau\}$  in blocks of multiple products (Chib and Greenberg 1995).

### (3) Updating Covariance Matrices

Conditional on the values of the individual-specific random effects ( $\{\zeta_i\}$  and  $\{\xi_i\}$ ) and the product-specific random effects ( $\{\kappa\}$  and  $\{\tau\}$ ), the corresponding covariance matrices can be sampled directly. We begin by drawing values of  $\Sigma$  conditional on the individual-specific random effects  $\{\zeta_i\}$ . Following Netzer, Lattin and Srinivasan (2005), the conditional distribution of  $\Sigma$  is given by:

$$\Sigma | \{\zeta_i\} \sim IW_p \left( f_0 + N, G_0^{-1} + \sum_{i=1}^N \zeta_i' \zeta_i \right) \quad (\text{A9})$$

where  $IW_p$  denotes an inverse-Wishart distribution,  $p$  is the length of the vector  $\zeta_i$  (in our case,  $p=6$ ), and  $N$  is the number of observations. To assume a diffuse prior, we assume that  $f_0=p+5$  and  $G_0^{-1}$  is an identity matrix of size  $p$ .

In the same fashion, the covariance matrix  $T$  is drawn from the conditional distribution  $T | \{\xi_i\}$ , the variance  $\sigma_\kappa^2$  is drawn from the distribution  $\sigma_\kappa^2 | \{\kappa\}$ , and  $\sigma_\tau^2$  is drawn from  $\sigma_\tau^2 | \{\tau\}$ .

#### (4) Updating Fixed Effects

The vector of fixed effects  $\psi$  is drawn in a similar fashion to the individual-specific and product-specific random effects. The conditional distribution of  $\psi$  is given by:

$$\begin{aligned} f(\psi | \mathbf{Y}, \mathbf{X}, \{\zeta_i\}, \{\xi_i\}, \{\kappa\}, \{\tau\}) \\ \propto \pi(\psi) L(\mathbf{Y} | \psi) \\ \propto |\mathbf{V}|^{-.5} \exp[.5\psi' \mathbf{V}^{-1} \psi] L(\mathbf{Y} | \psi) \end{aligned} \quad (\text{A10})$$

where  $\pi(\psi)$  is the prior distribution of  $\psi$ . We assume a diffuse normal prior by setting the mean equal to a vector of zeros of length  $q$ , where  $q$  is the length of  $\psi$ , and covariance matrix  $\mathbf{V} = 5I_q$ . As the conditional distribution given in (A10) does not have a closed form, we use a random walk Metropolis-Hastings algorithm to draw from the conditional distribution. The probability of accepting draw  $t+1$  is given by:

$$\text{Pr}(\text{accept}) = \min \left( \frac{\exp[-.5\psi^{(t+1)'} \mathbf{V}^{-1} \psi^{(t+1)}] L(\mathbf{Y} | \psi^{(t+1)})}{\exp[-.5\psi^{(t)'} \mathbf{V}^{-1} \psi^{(t)}] L(\mathbf{Y} | \psi^{(t)})}, 1 \right) \quad (\text{A11})$$

#### Additional References

Chib, Siddhartha and Edward Greenberg (1995), "Understanding the Metropolis-Hastings Algorithm," *The American Statistician*, 49 (4), 327-335.

Netzer, Oded, James M. Lattin and V. Srinivasan (2008), "A Hidden Markov Model of Customer Relationship Dynamics," *Marketing Science*, 27 (2), 185-204.
